# Supplementary material for: A MUB E2 structure reveals E1 selectivity between cognate ubiquitin E2s in eukaryotes
Source: PubMed Central journal article supplement (PMC4996978; doi:10.1038/ncomms12580), 2016-08-23
Supplement: ncomms12580-s1.pdf [file ncomms12580-s1.pdf]

## Supplementary Figures

### Supplementary Figure 1: Isothermal Titration Calorimetry of AtUBC8 and AtMUB3

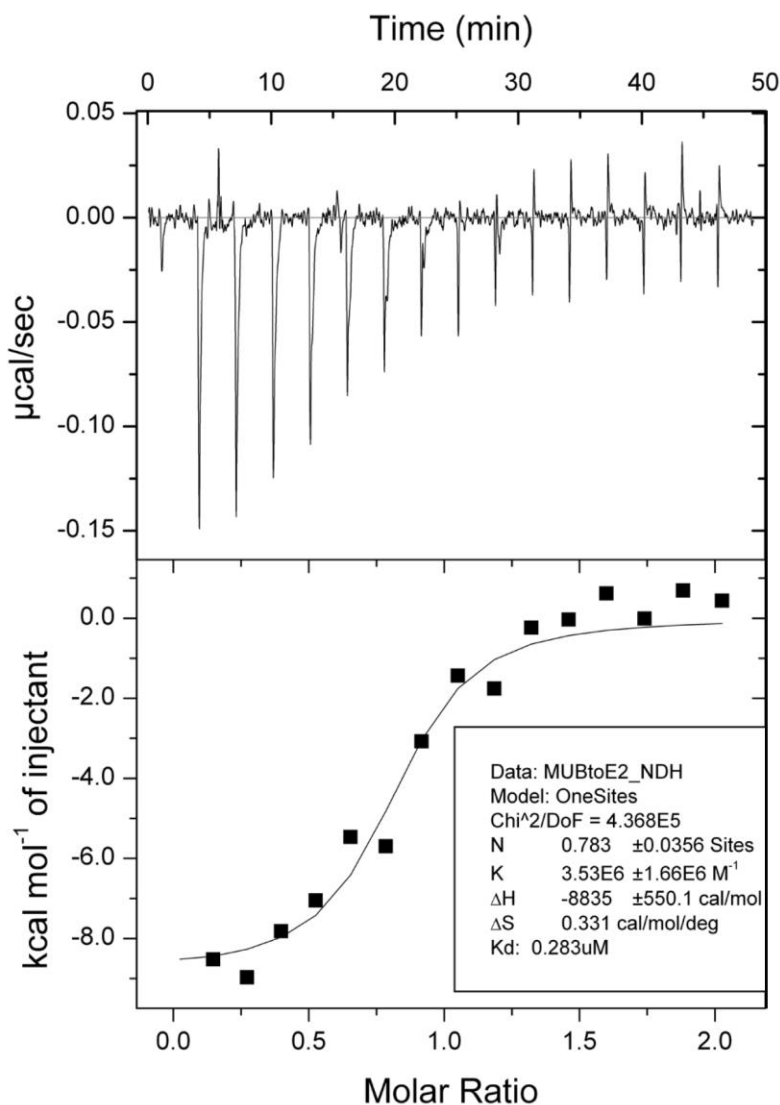

Isothermal titration calorimetry (ITC) was performed on 8  $\mu\text{M}$  AtUBC8 with 110  $\mu\text{M}$  AtMUB3 as the titrant using a MicroCal iTC200 (GE). Proteins were purified as described for crystallization and dialyzed extensively against a buffer containing 25mM HEPES, pH7.5, 200mM NaCl, 1mM TCEP. Data was processed with MicroCal Origin 7 software, and normalized against the dialysis buffer's heat of dilution. This plot is representative of 3 independent experiments, which yielded similar results but were performed at different concentrations of NaCl.

## Supplementary Figure 2: Proteins aligned for r.m.s.d determination

**A**

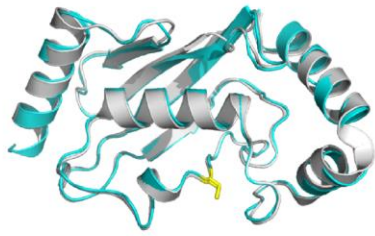

r.m.s.d. = 0.7 Å

**B**

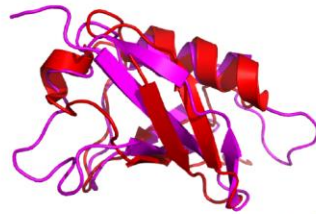

r.m.s.d. = 1.8 Å

**C**

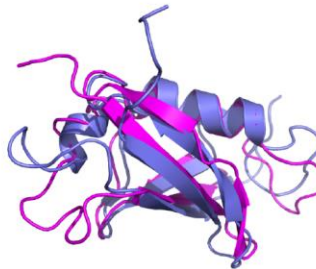

r.m.s.d. = 0.8 Å

**D**

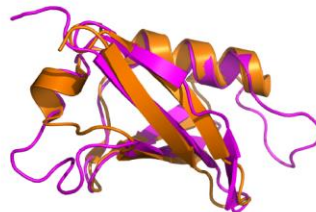

r.m.s.d. = 1.6 Å

(a) AtUBC8 (present study), cyan, is superimposed to Ube2D3 (3UGB), grey.

(b) AtMUB3 (present study), magenta, is superimposed to Ub (2FUH), red.

(c) AtMUB3 (present study), magenta, is superimposed to AtMUB1 (1SE9), slate.

(d) AtMUB3 (present study), magenta, is superimposed to HsSUMO1 (2UYZ), orange.

### Supplementary Figure 3: BBS configuration shared by MUB, Ub and SUMO

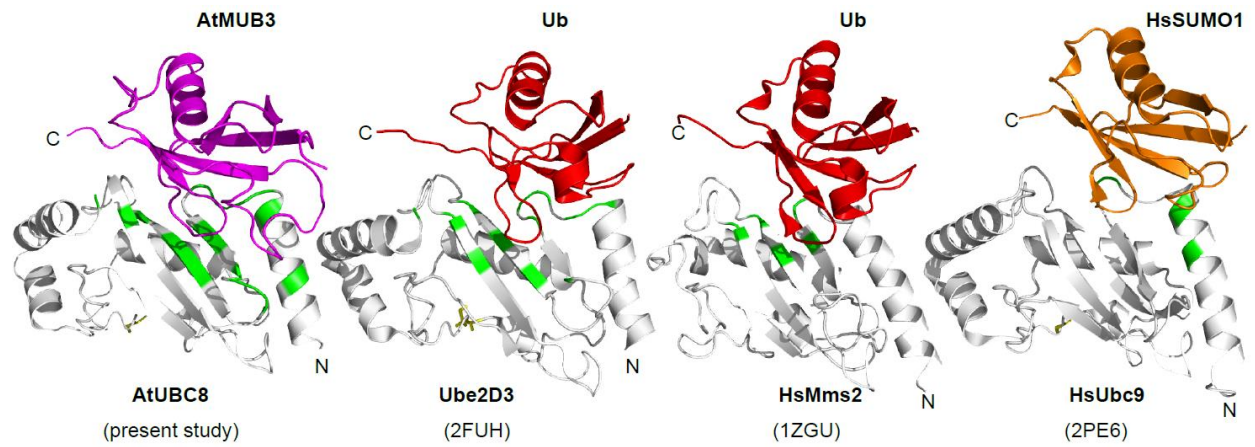

Structures of AtMUB3 (magenta), HsUb (red) and HsSUMO1 (orange) bind at the BBS of respective E2s. All E2s are colored in grey with the binding area colored in green.

## Supplementary Figure 4: AtMUB3 interacting vs. non-MUB-interacting Arabidopsis E2s

**A**

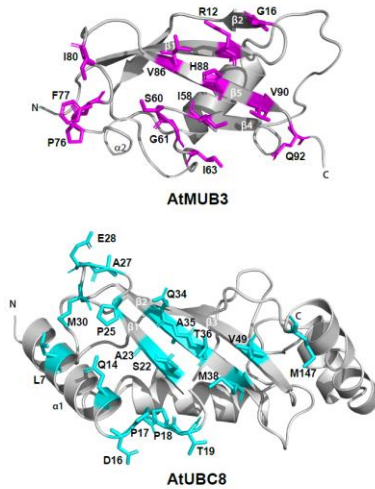

**B**

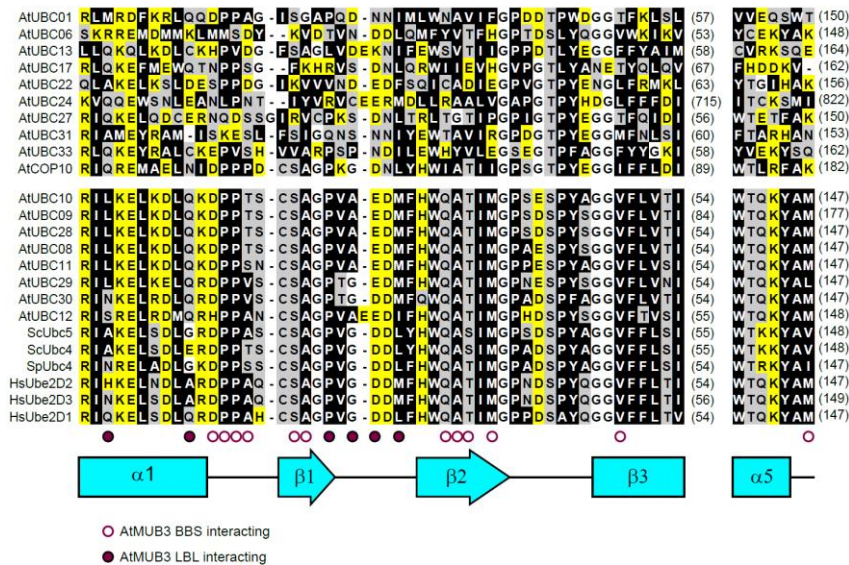

(a) The AtMUB3:AtUBC8 complex is presented in open book configuration with interacting residues depicted in stick format. Binding residues are colored magenta in AtMUB3 (Top panel), cyan in AtUBC8 (bottom panel). Secondary structures supporting the interaction residues are indicated.

(b) Protein sequence alignment colored as in Fig. 3. Sequences above the space do not interact with MUB by yeast two-hybrid.

**Supplementary Figure 5: Stereo view of representative AtMUB3 AtUBC8 electron density**

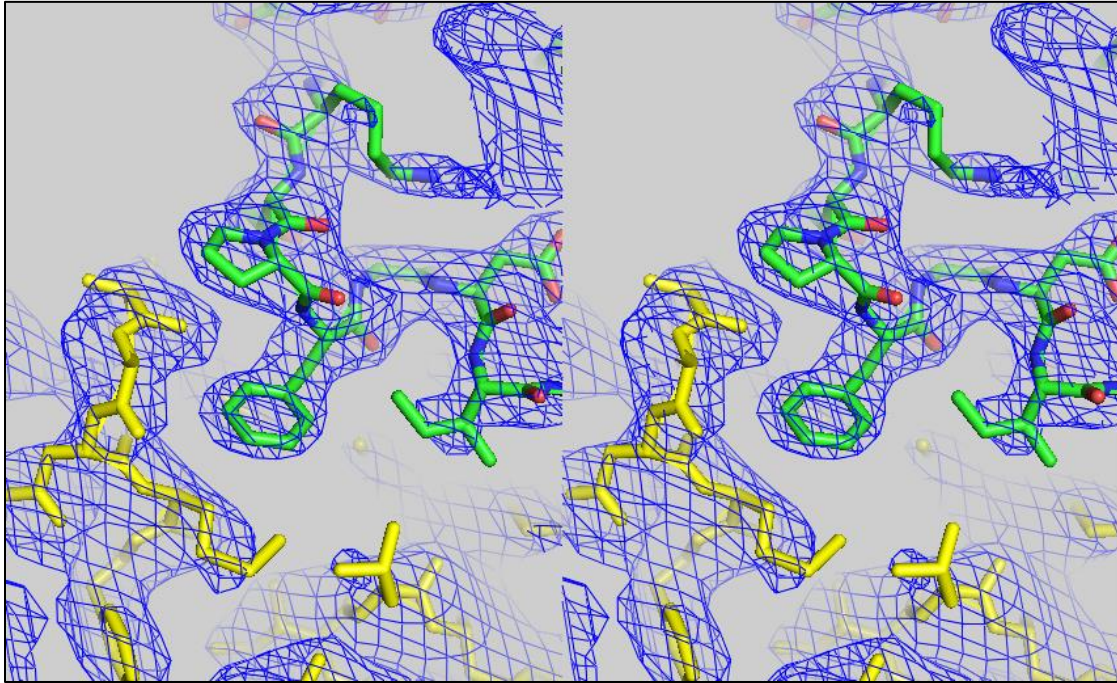

The AtMUB3 LBL (green) with AtUBC8 (yellow) interface represented using a 2Fo-Fc electron density map contoured at 1 *sigma* level.

**Supplementary Figure 6: MUB LBL construct diagram**

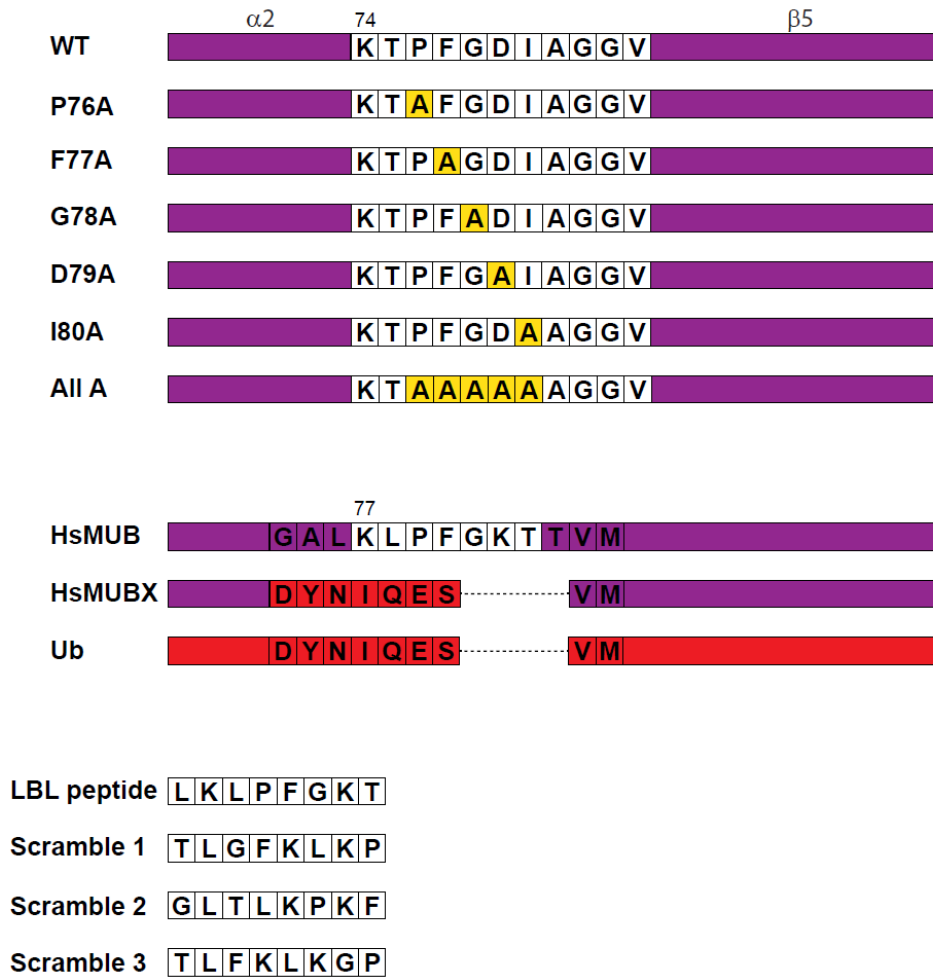

MUB LBL mutants are shown in bar diagrams with LBL detailed and colored in white. Mutated residues are highlighted in yellow. Top panel is AtMUB3 mutants, middle panel is HsMUB mutants with Ub as reference, and bottom panel is LBL and scramble peptides.



**Supplementary Figure 7: MUB3 LBL core residues are critical for inhibiting E2~Ub**

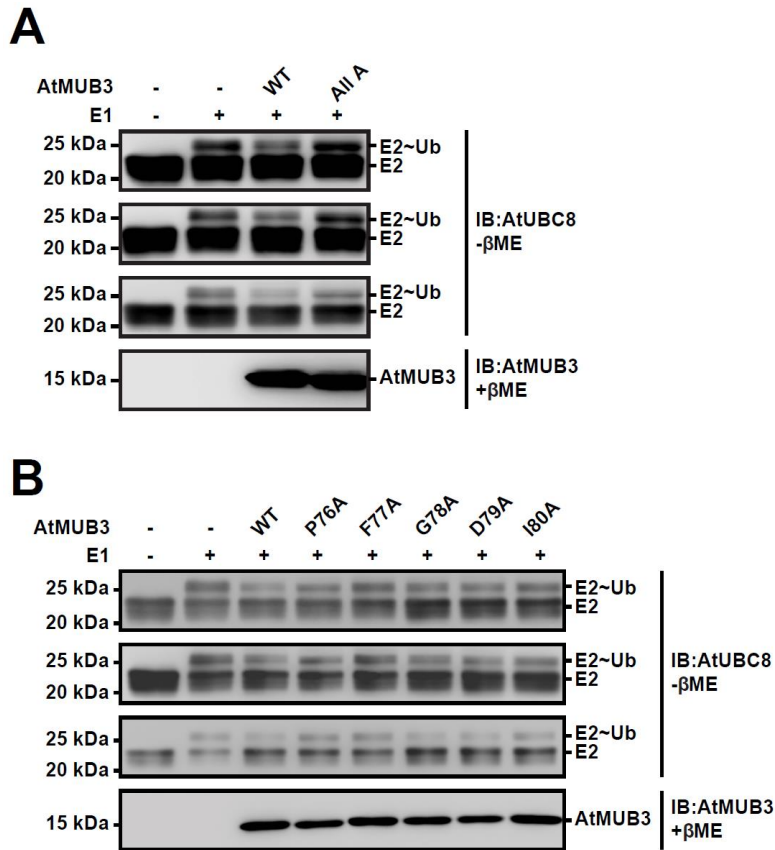

AtUBC8~Ub thioester formation assays exposed to

(a) AtMUB3 LBL core quintuple mutant (All A)

(b) AtMUB3 LBL core single mutants are shown as immunoblot. Experiments were performed in triplicate prior to quantification of band chemiluminescence.

**Supplementary Figure 8: A kinetic model for MUB inhibition of E2 activation**

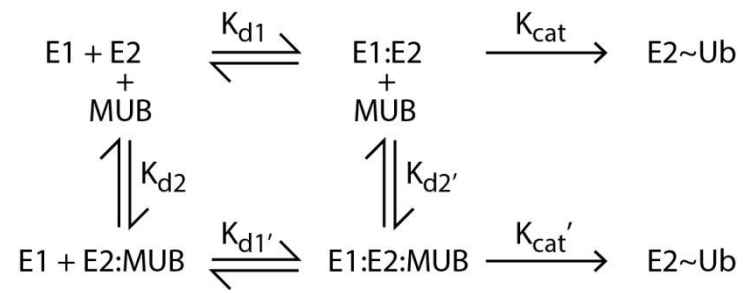



Supplementary Figure 9: Full immunoblots for Figure 2a

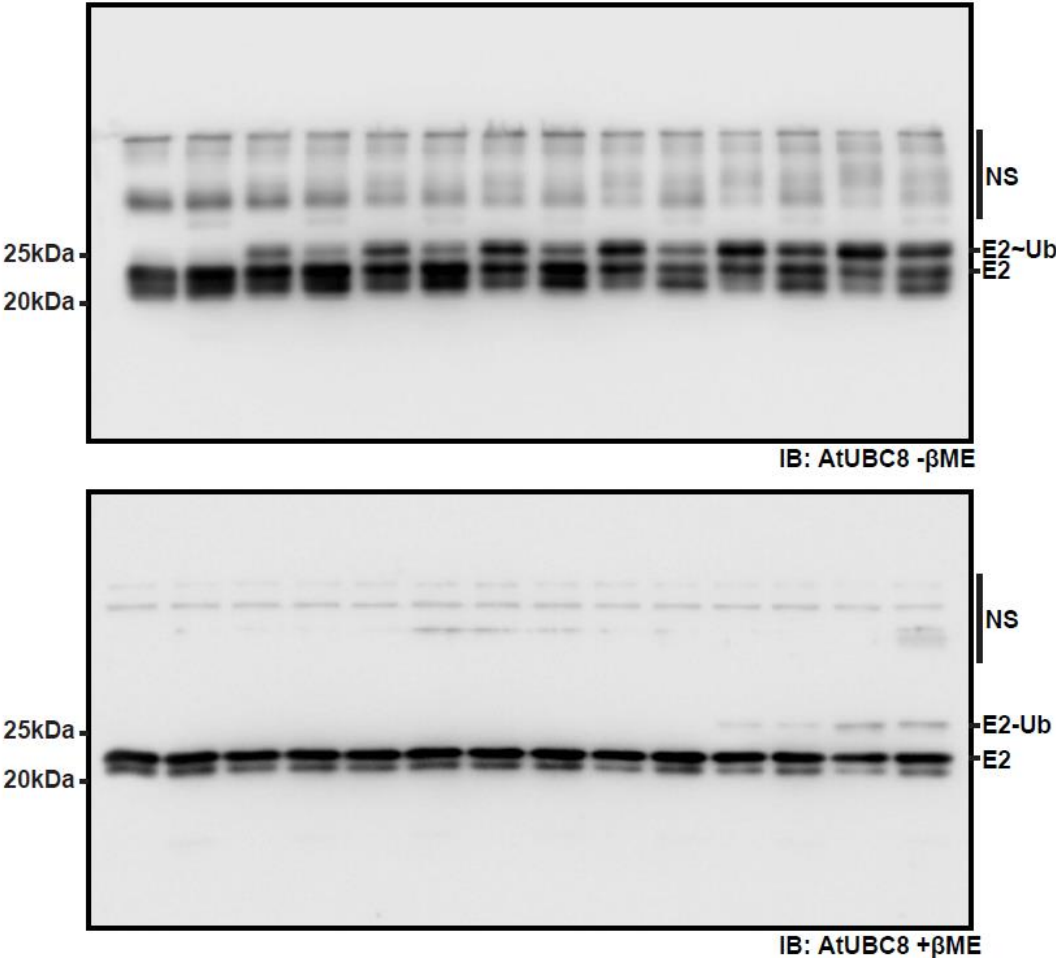

Non-specific bands (NS) correspond to those seen in the leftmost lane, which is minus E1 enzyme.

**Supplementary Figure 10: Full immunoblots for Figure 2b**

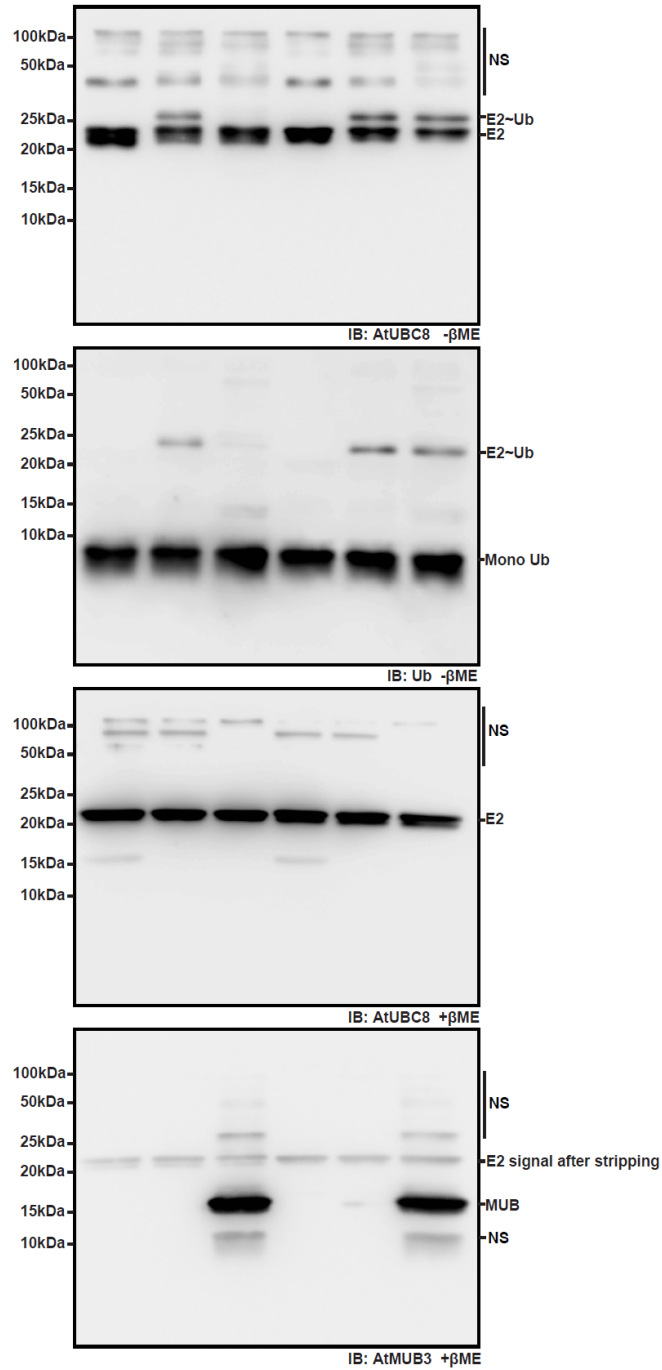

Non-specific bands (NS) correspond to those seen in the leftmost lane, which is minus E1 enzyme, as described.

Supplementary Figure 11: Full immunoblots for Figure 2c

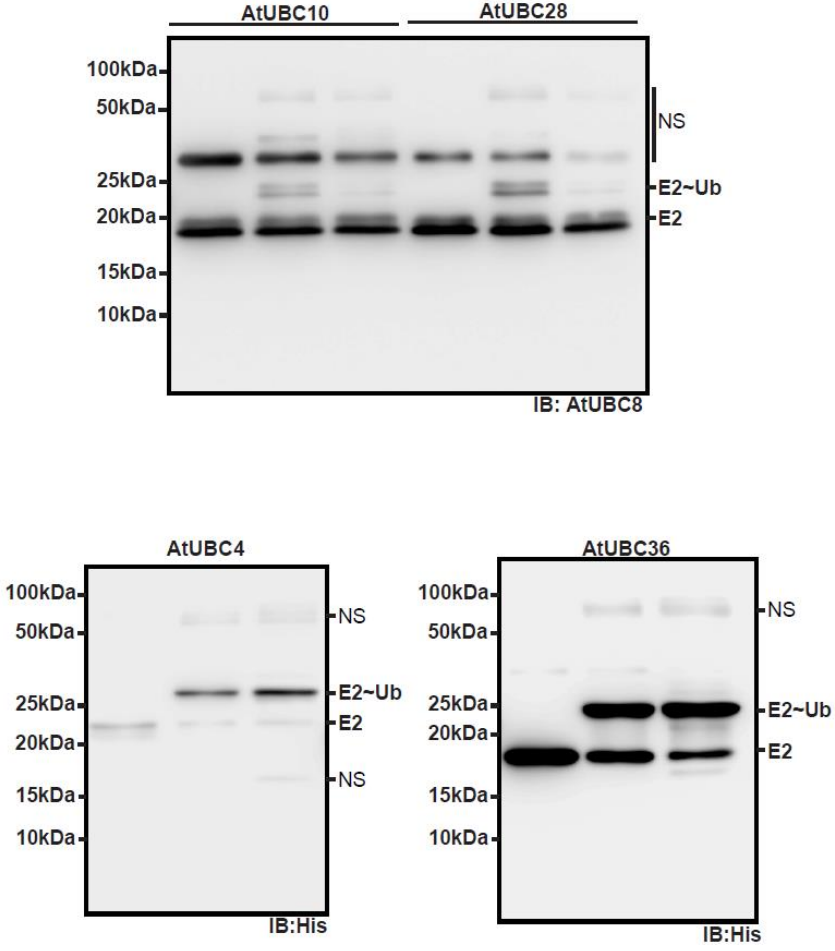

Supplementary Figure 12: Full immunoblots for Figure 3c

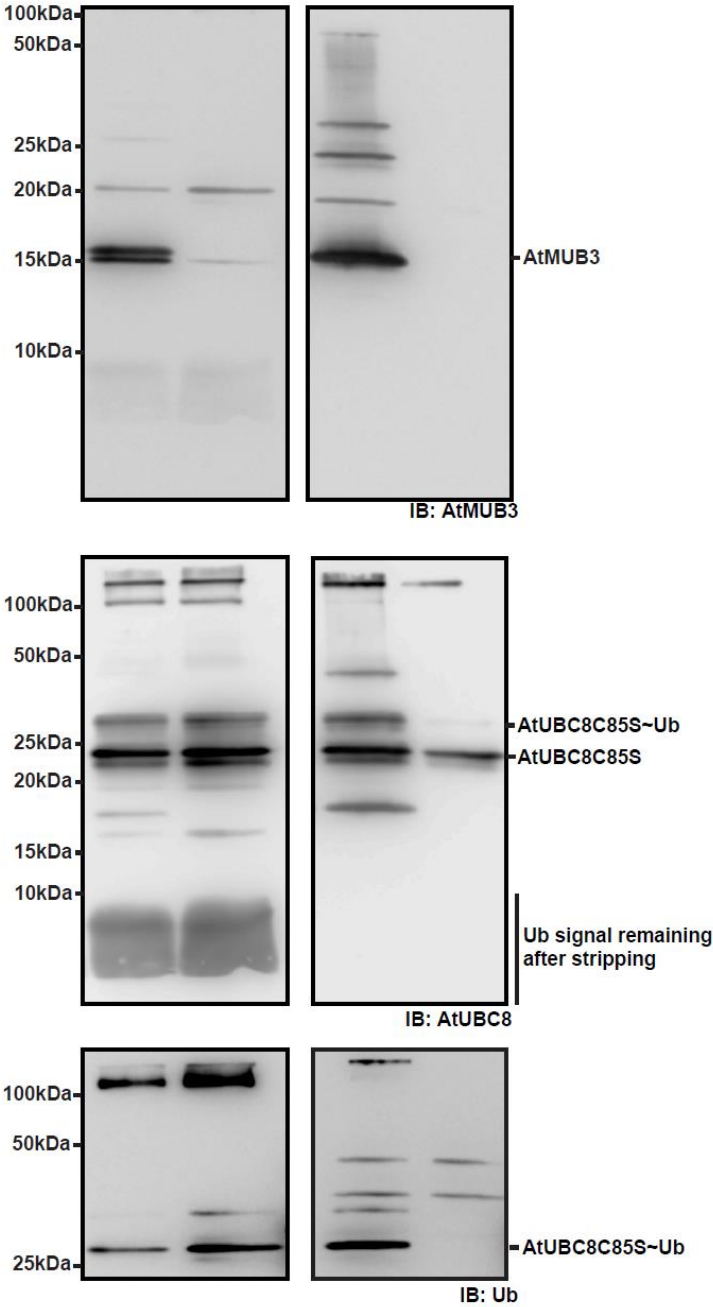

Supplementary Figure 13: Full immunoblots for Figure 3e

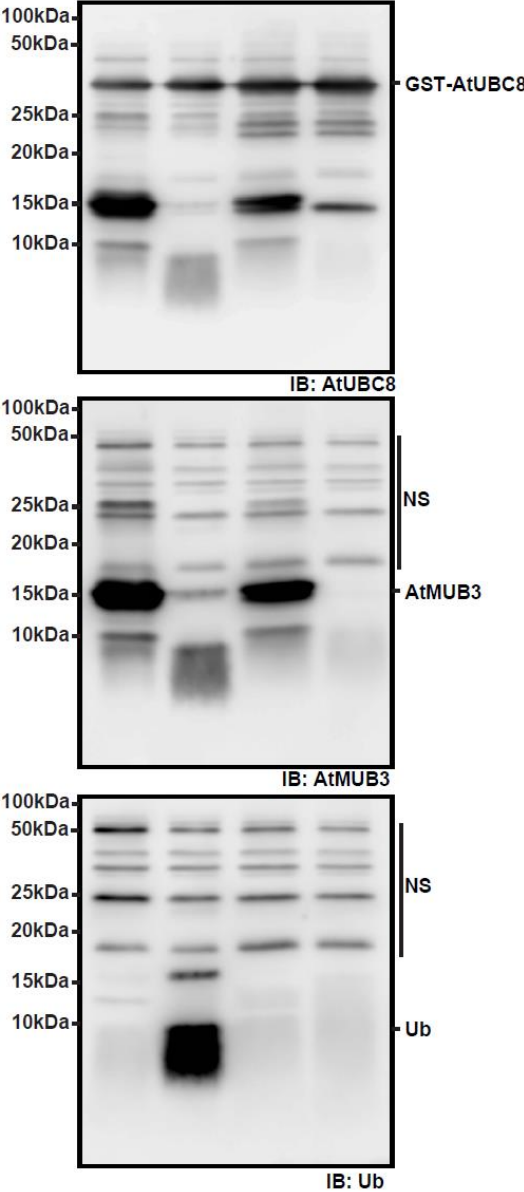

Non-specific (NS) from immunoblot stripping and reprobing.

Supplementary Figure 14: Full immunoblots for Figure 5a

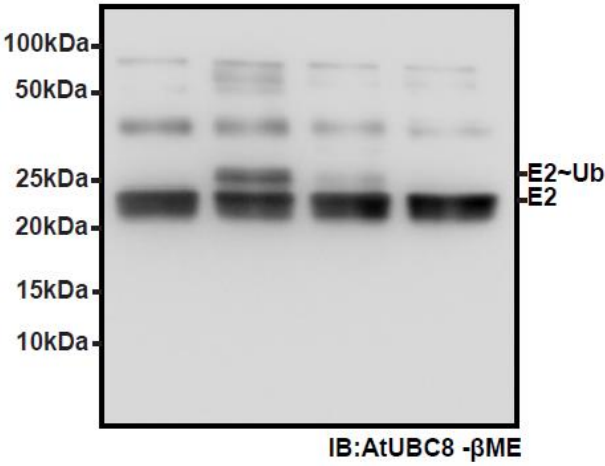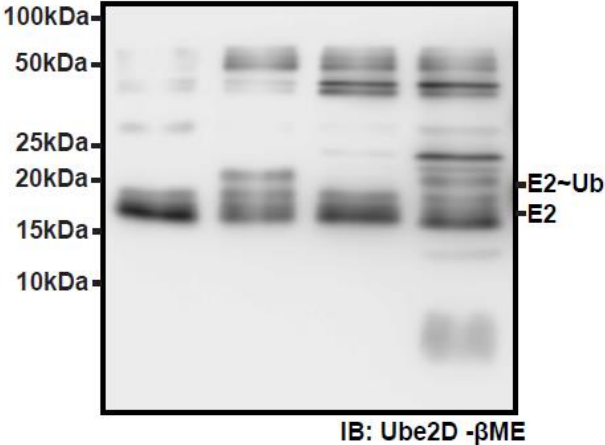

Supplementary Figure 15: Full immunoblots for Figure 5b

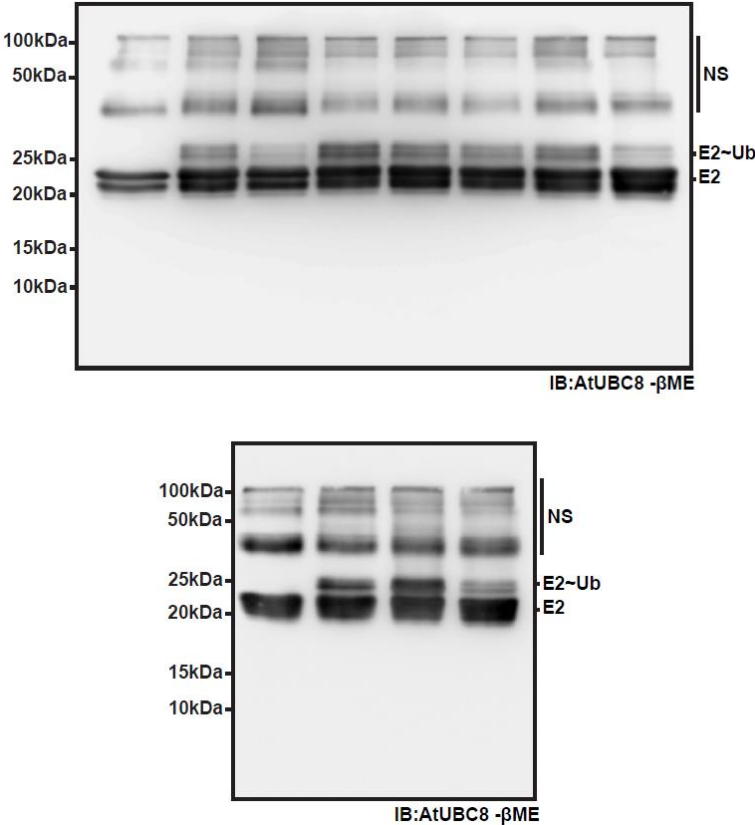

Non-specific bands (NS) correspond to those seen in the leftmost lane, which is minus E1 enzyme.



Supplementary Figure 16: Full immunoblots for Figure 5d

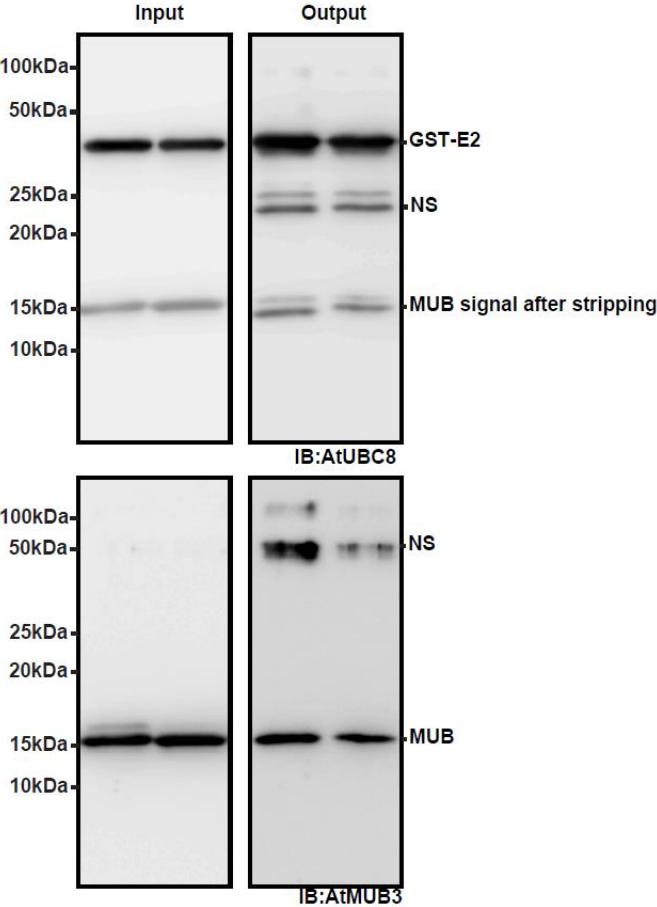

## Supplementary Tables

Supplementary Table 1: Surface characteristics of structures shown in Figure S3

|         | <b>Protein 1</b> | <b>Protein 2</b> | <b>Surface area (Å<sup>2</sup>)*</b> | <b>ΔG*</b> |
|---------|------------------|------------------|--------------------------------------|------------|
| current | AtUBC8           | AtMUB3           | 890.6                                | -11.7      |
| current | AtUBC8           | AtMUB3 (74-82aa) | 288.2                                | -5.0       |
| 2FUH    | HsUbe2D3         | HsUb             | 547.2                                | -8.3       |
| 1ZGU    | HsMMS2           | HsUb             | 624.8                                | -5.4       |
| 2PE6    | HsUBC9           | HsSUMO1          | 560.4                                | -0.2       |

\* Analysis performed using CCP4 v. 6.5

## Supplementary Table 2: Subcloning details and primer sequences

| Lab ID | Protein                                 | Plasmid name                           | entry vector                 |
|--------|-----------------------------------------|----------------------------------------|------------------------------|
| p72    | His-AtMUB3                              | pET28b+AtMUB3*                         |                              |
| p458   | AtMUB3-TEV-HIS                          | pET28b+AtMUB3TEV                       |                              |
| p469   | AtMUB3 P76A-TEV-HIS                     | pET28b+AtMUB3 P76A                     |                              |
| p460   | AtMUB3 F77A-TEV-HIS                     | pET28b+AtMUB3 F77A                     |                              |
| p470   | AtMUB3 G78A-TEV-HIS                     | pET28b+AtMUB3 G78A                     |                              |
| p471   | AtMUB3 D79A-TEV-HIS                     | pET28b+AtMUB3 D79A                     |                              |
| p472   | AtMUB3I80A-TEV-HIS                      | pET28b+AtMUB3 I80A                     |                              |
| p463   | AtMUB3 P76A F77A G78A D79A I80A-TEV-HIS | pET28b+AtMUB3 P76A F77A G78A D79A I80A |                              |
| p434   | AtMUB3-TEV-His-FLAG                     | DNA2.0+AtMUB3                          |                              |
| p462   | HsMUB-TEV-His                           | pET28b+HsMUB                           |                              |
| p522   | AtUBC8 C85S-TEV-His                     | p0GWA+AtUBC8 C85S TEV                  | pentr-D-TOPO+AtUBC8 C85S TEV |
| p265   | His-AtUBC8                              | pHWA+AtUBC8*                           | pentr-D-TOPO+AtUBC8*         |
| p431   | AtUBC8-TEV-His                          | p0GWA+AtUBC8TEV                        | pentr-D-TOPO+AtUBC8 TEV      |
| p432   | AtUBC8 S22R-TEV-His                     | p0GWA+AtUBC8 S22R TEV                  | pentr-D-TOPO+AtUBC8 S22R TEV |
| p269   | GST-AtUBC8                              | pGGWA+AtUBC8*                          | pentr-D-TOPO+AtUBC8*         |
| p448   | His-AtUBC4                              | pHWA+AtUBC4*                           | pDONR201+AtUBC4*             |
| p449   | His-AtUBC10                             | pHWA+AtUBC10*                          | pDONR201+AtUBC10*            |
| p453   | His-AtUBC28                             | pHWA+AtUBC28*                          | pDONR201+AtUBC28*            |
| p454   | His-AtUBC36                             | pHWA+AtUBC36*                          | pDONR201+AtUBC36*            |
| p461   | Ube2D3-TEV-His                          | p0GWA+Ube2D3                           | pentr-D-TOPO+Ube2D3          |

|                      |
|----------------------|
| Conventional Cloning |
| Gateway Cloning      |

| Lab ID | 5' primer/resriction site                                            | 3' primers/resriction site                               |
|--------|----------------------------------------------------------------------|----------------------------------------------------------|
| p72    |                                                                      |                                                          |
| p458   | CCCTCTAGAAATAATTTTGTAACTTTAAGAAGGAGATATACCATGCCGGAGGAAGAATCGAT /XbaI | CTAGCTCGAGTCCCTGAAAAACACAGGTTTTCCAAAAATGGTGGATGTGCA/XhoI |
| p469   | CCCTCTAGAAATAATTTTGTAACTTTAAGAAGGAGATATACCATGCCGGAGGAAGAATCGAT /XbaI | CTAGCTCGAGTCCCTGAAAAACACAGGTTTTCCAAAAATGGTGGATGTGCA/XhoI |
| p460   | CCCTCTAGAAATAATTTTGTAACTTTAAGAAGGAGATATACCATGCCGGAGGAAGAATCGAT /XbaI | CTAGCTCGAGTCCCTGAAAAACACAGGTTTTCCAAAAATGGTGGATGTGCA/XhoI |
| p470   | CCCTCTAGAAATAATTTTGTAACTTTAAGAAGGAGATATACCATGCCGGAGGAAGAATCGAT /XbaI | CTAGCTCGAGTCCCTGAAAAACACAGGTTTTCCAAAAATGGTGGATGTGCA/XhoI |
| p471   | CCCTCTAGAAATAATTTTGTAACTTTAAGAAGGAGATATACCATGCCGGAGGAAGAATCGAT /XbaI | CTAGCTCGAGTCCCTGAAAAACACAGGTTTTCCAAAAATGGTGGATGTGCA/XhoI |
| p472   | CCCTCTAGAAATAATTTTGTAACTTTAAGAAGGAGATATACCATGCCGGAGGAAGAATCGAT /XbaI | CTAGCTCGAGTCCCTGAAAAACACAGGTTTTCCAAAAATGGTGGATGTGCA/XhoI |
| p463   | CCCTCTAGAAATAATTTTGTAACTTTAAGAAGGAGATATACCATGCCGGAGGAAGAATCGAT /XbaI | CTAGCTCGAGTCCCTGAAAAACACAGGTTTTCCAAAAATGGTGGATGTGCA/XhoI |
| p434   |                                                                      |                                                          |
| p462   | ccctctagaaataattttgttaactttaagaaggagatataccatgccggaaggaaatcgat /XbaI | CTAGCTCGAGTACAGGATTACACAACAATTACTCTCCAGTCTTCTC /XhoI     |
| p522   | CACCATGGCTTCGAAACGGATCTTG                                            | tcctgaaataacaggttttcTCCGCCCATGGCATA                      |
| p265   | CACCATGGCTTCGAAACGGATCTTG                                            | TTAGCCCATGGCATACTTCTGAGTCCA                              |
| p431   | CACCATGGCTTCGAAACGGATCTTG                                            | tcctgaaataacaggttttcTCCGCCCATGGCATA                      |
| p432   | CACCATGGCTTCGAAACGGATCTTG                                            | tcctgaaataacaggttttcTCCGCCCATGGCATA                      |
| p269   | CACCATGGCTTCGAAACGGATCTTG                                            | TTAGCCCATGGCATACTTCTGAGTCCA                              |
| p448   |                                                                      |                                                          |
| p449   |                                                                      |                                                          |
| p453   |                                                                      |                                                          |
| p454   |                                                                      |                                                          |
| p461   |                                                                      |                                                          |

| Lab ID | bridging PCR primer forward                                  | bridging PCR primer reverse                                   |
|--------|--------------------------------------------------------------|---------------------------------------------------------------|
| p72    |                                                              |                                                               |
| p458   |                                                              |                                                               |
| p469   | AAGACAGCATTGGAGATATTGCTGGTGGAGTCATTGTGATGCATGTTGTTGACAGCCT   | TCCACCAGCAATATCCCAAATGCTGTCTTACACTGCCCAACAGCTCTGTTGTTCTCCAA   |
| p460   | AAGACAGCAGCTGGAGATATTGCTGGTGGAGTCATTGTGATGCATGTTGTTGACAGCCT  | TCCACCAGCAATATCCCAAATGCTGTCTTACACTGCCCAACAGCTCTGTTGTTCTCCAA   |
| p470   | AAGACACCAATTTGGAGATATTGCTGGTGGAGTCATTGTGATGCATGTTGTTGACAGCCT | TCCACCAGCAATATCCCAAATGCTGTCTTACACTGCCCAACAGCTCTGTTGTTCTCCAA   |
| p471   | AAGACACCAATTTGGAGCTATTGCTGGTGGAGTCATTGTGATGCATGTTGTTGACAGCCT | TCCACCAGCAATAGCTCCCAAATGCTGTCTTACACTGCCCAACAGCTCTGTTGTTCTCCAA |
| p472   | AAGACACCAATTTGGAGATGCTGCTGGTGGAGTCATTGTGATGCATGTTGTTGACAGCCT | TCCACCAGCAGCATCTCCCAAATGCTGTCTTACACTGCCCAACAGCTCTGTTGTTCTCCAA |
| p463   | AAGACAGCAGCTGCAGTCTGCTGGTGGAGTCATTGTGATGCATGTTGTTGACAGCCT    | TCCACCAGCAGCAGCTGCAGTCTGCTGTCTTACACTGCCCAACAGCTCTGTTGTTCTCCAA |
| p434   |                                                              |                                                               |
| p462   |                                                              |                                                               |
| p522   | TTAGCCTTGACATTTTGAAGAAGATGGAGCCCTGCCCTCACCATTTCCAAGTGTGTC    | GCAACACCTTGGAAATGGTGGAGGCCAGGCTCCATGTTCTTTCCAAAATGTCAGGCTAA   |
| p265   |                                                              |                                                               |
| p431   |                                                              |                                                               |
| p432   |                                                              |                                                               |
| p269   |                                                              |                                                               |
| p448   |                                                              |                                                               |
| p449   |                                                              |                                                               |
| p453   |                                                              |                                                               |
| p454   |                                                              |                                                               |
| p461   |                                                              |                                                               |
